# Supplementary material
Source: PubMed Central journal article supplement (PMC10842363)
Supplement: NIHMS1939379-supplement-2.pdf [file NIHMS1939379-supplement-2.pdf]

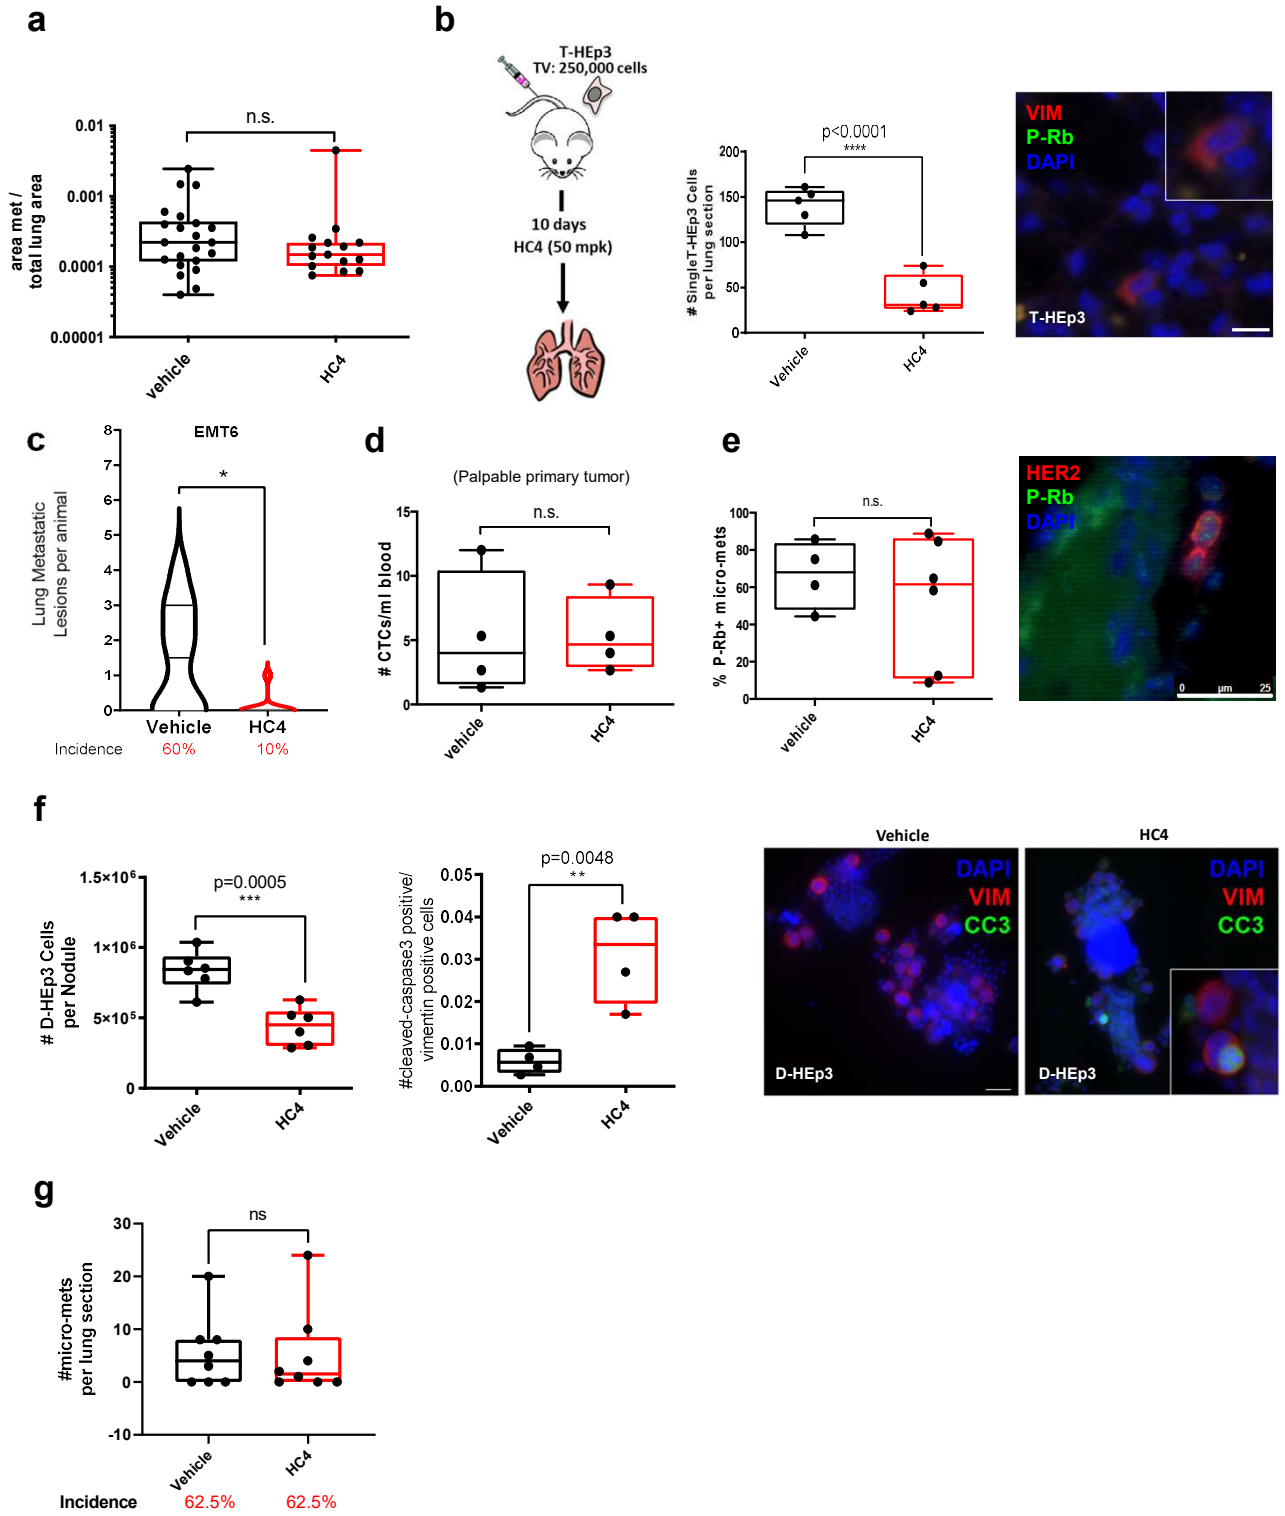

**Supplementary Figure S2.** (a) Normalized area of single macro-metastases in lung in vehicle (N=22) and HC4-treated animals (N=15). P by Mann-Whitney test. (b)  $2.5 \times 10^5$  HNSCC T-Hep3 cells as single cell suspensions were injected via tail vein in Balb/c nu/nu mice and 24 h after injection animals were treated with vehicle or HC4 (50 mg/kg) for 10 days. Frequency of T-Hep3 DCCs in the lung detected via a human specific anti-vimentin antibody was scored. 5 lung sections/animal  $\pm$  s.d (N=5 per group). Scale bar, 10  $\mu$ m. P by Mann-Whitney test. (c) Balb/c syngeneic EMT6 mice were treated with HC4 at 10 mg/kg for 17 days. Metastatic lesions were detected by H&E staining and quantified in 5 lung section/animal. P by Mann-Whitney test. (d) Quantification of circulating tumor cells/ml blood by HER2 staining of cytopins (N=4 per group) P by Mann-Whitney test. (e) Percentage P-Rb+ micro-metastasis per lung section/animal in vehicle (N=4) and HC4-treated animals (N=6). Scale bar, 25  $\mu$ m. P by Student's t test. (f) Number of D-Hep3 cells per nodule in vehicle and HC4-treated (20  $\mu$ M, 6 days) CAM tumors (N=6 per group) (left); quantification and representative images of D-Hep3 CAM tumors stained for cleaved caspase-3 (green), vimentin (red), and DAPI (blue) (right). Approximately 1000 cells per group were assessed, p by Mann-Whitney test. Scale bars, 25  $\mu$ m. (g) Mice were injected with MMTV-HER2 cells from primary tumor lesions via the tail vein, allowed them to expand into established metastatic lesions for 3 weeks and treated with vehicle or HC4 (50 mg/kg) for 2 weeks. Micro-metastasis were detected by H&E or IF (HER2 detection) staining and quantified in 5 lung section/animal  $\pm$  s.d (N=8 per group). P by Mann-Whitney test.
