# Supplementary material
Source: PubMed Central journal article supplement (PMC10842363)
Supplement: NIHMS1939379-supplement-3.pdf [file NIHMS1939379-supplement-3.pdf]

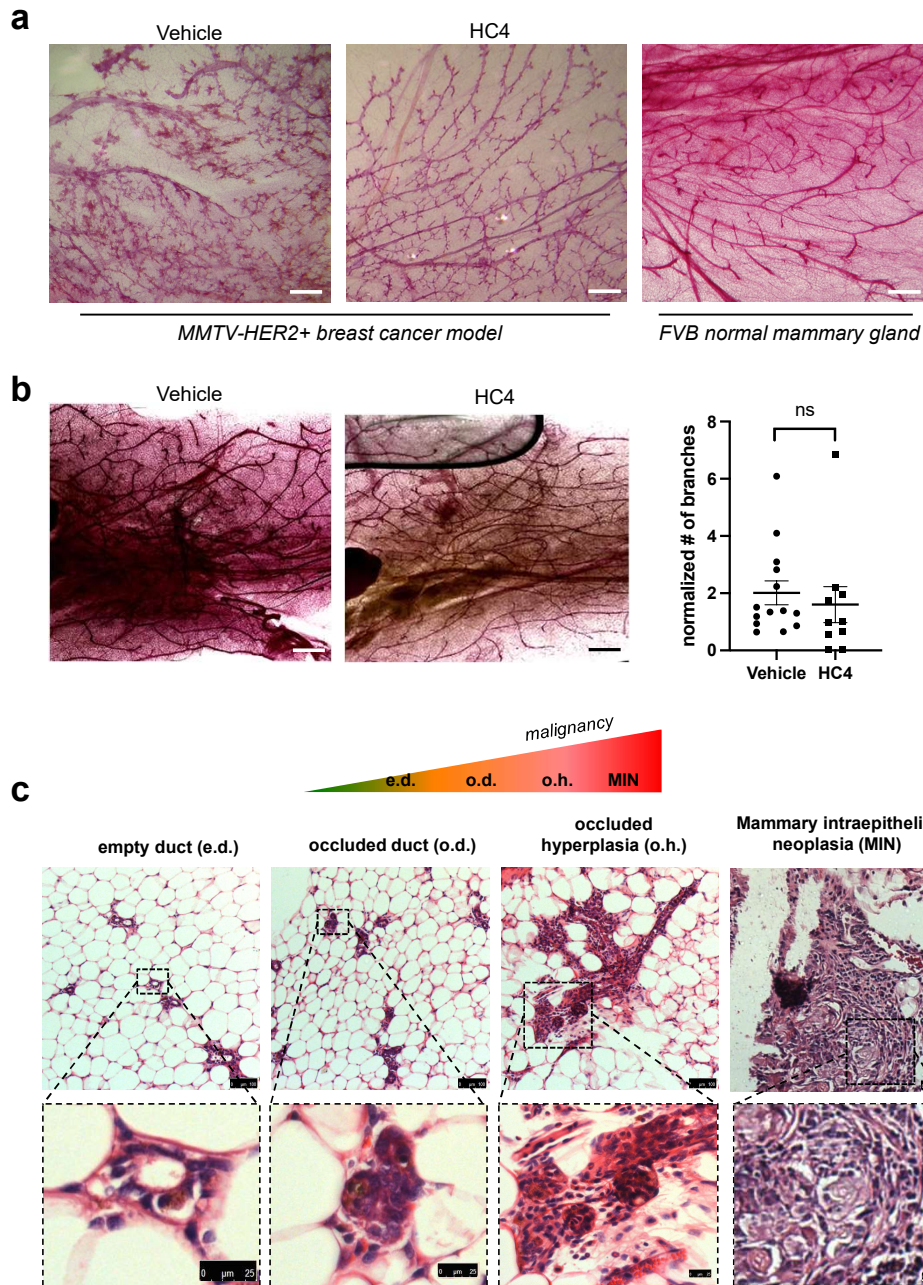

**Supplementary Figure S3.** (a) Representative images of carmine staining of whole mount FVB normal mammary gland compared to vehicle- and HC4-treated MMTV-HER2 mammary gland whole mount. Scale bar 2 mm. (b) Examples of the mammary gland histological structures quantified. Scale bar 3 mm. Number of normal branches in the mammary gland ductal tree of non-tumor bearing healthy mice treated with vehicle (N=14) or HC4 (N=10). P by Mann-Whitney test. (c) The panels show representative images of histological sections showing at low magnification (top row 100  $\mu$ m scale bar) the indicated ductal and early lesion structures; the lower row showed higher magnification (25  $\mu$ m scale bars) these structures. These images were used as a key to classify per animal the effects of control or HC4 treatments.
