# Supplementary material
Source: PubMed Central journal article supplement (PMC10842363)
Supplement: NIHMS1939379-supplement-5.pdf [file NIHMS1939379-supplement-5.pdf]

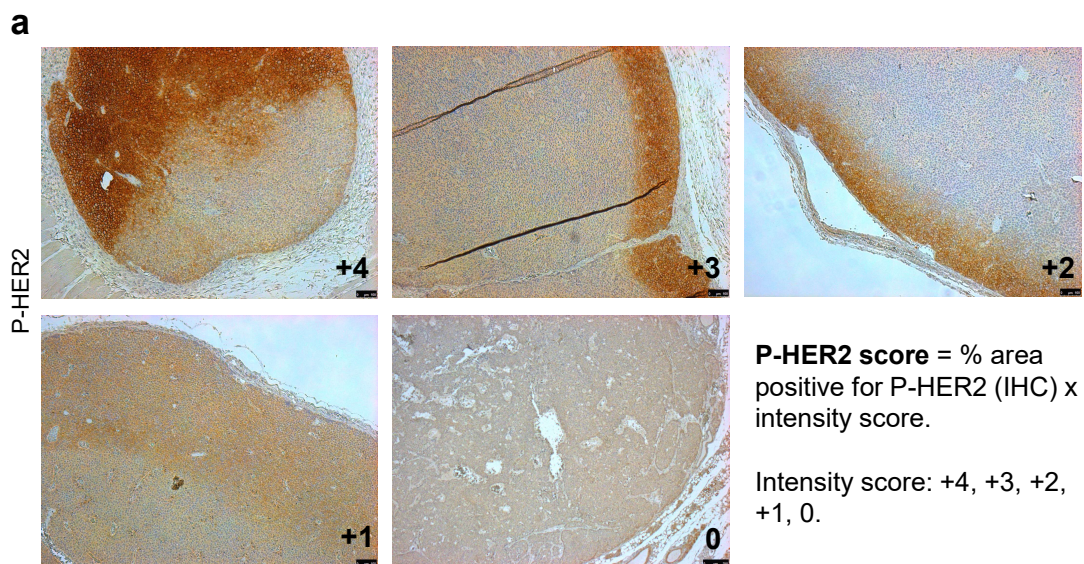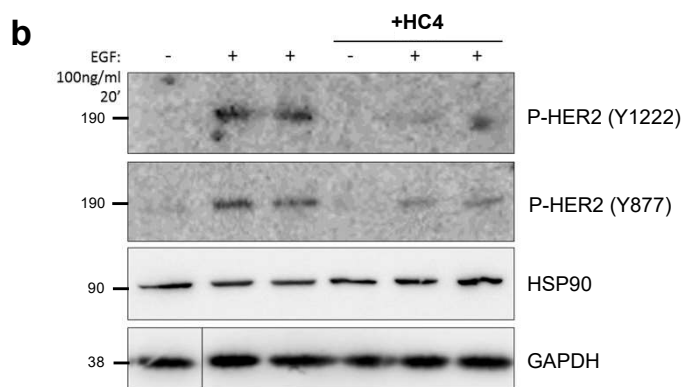

**Supplementary Figure S5.** (a) Scoring system used for the quantification of P-HER2 levels in mammary gland tumor sections. The IHC P-HER2 positive area was multiplied by its intensity score according to established score shown in these representative images. Scale bar, 100  $\mu$ m. (b) MCF10A-HER2 cells were starved o/n and treated +/-HC4 (2  $\mu$ M), after which +/-EGF (100 ng/ml) was added for 20 min before collection. The levels of P-HER2/Y1112 and P-HER2/Y877 were assessed by Western blot. GAPDH and HSP90 were used as loading controls.
