# Supplementary material
Source: PubMed Central journal article supplement (PMC10842363)
Supplement: NIHMS1939379-supplement-6.pdf [file NIHMS1939379-supplement-6.pdf]

**Supplementary Table 1 Human breast cancer metastases samples**

| Patient | ID          | ER status | PR status | Her2 status | Pathology                                   | Metastasis sample | Cytokeratins | Ki67  | GADD34 |
|---------|-------------|-----------|-----------|-------------|---------------------------------------------|-------------------|--------------|-------|--------|
| 2       | 14850       | Neg       | Neg       | Pos         | Ductal carcinoma                            | lymph node        | positive     | 8.41  | 23.20  |
| 10      | 14851       | Pos       | Neg       | Pos         | Ductal carcinoma                            | lymph node        | positive     | 0.12  | 36.34  |
| 7       | 14852       | Neg       | Neg       | Pos         | Ductal carcinoma                            | lymph node        | positive     | 1.97  | 10.57  |
| 5       | 14853       | Neg       | Neg       | Pos         | Ductal carcinoma                            | lymph node        | positive     | 3.55  | 10.28  |
| 3       | 14854       | Pos       | Pos       | Pos         | Ductal carcinoma                            | lymph node        | positive     | 4.56  | 11.24  |
| 6       | 14855       | Pos       | Pos       | Pos         | Ductal carcinoma                            | lymph node        | positive     | 2.05  | 59.67  |
| 9       | 14856       | Pos       | Pos       | Pos         | Ductal carcinoma                            | lymph node        | positive     | 1.15  | 41.82  |
| 1       | 14857       | Pos       | Pos       | Pos         | Ductal carcinoma                            | lymph node        | positive     | 13.26 | 9.75   |
| 4       | 14858       | Neg       | Neg       | Pos         | Ductal carcinoma                            | lymph node        | positive     | 4.36  | 3.96   |
| 8       | 14859       | Pos       | Neg       | Pos         | Ductal carcinoma                            | lymph node        | positive     | 1.41  | 41.90  |
|         | 9876 part D | Pos       | Pos       | Neg         | Invasive poorly differentiated              | lymph node        | positive     | 1.11  | 7.2    |
|         | 3603 part B | Pos       | Pos       | Neg         | Ductal moderately differentiated            | liver             | positive     | 4.2   | 0.35   |
|         | 879 part C  | Neg       | Neg       | Neg         | Not stated                                  | liver             | positive     | 19    | 0.5    |
|         | 1645 part F | Neg       | Neg       | Pos         | Ductal moderately differentiated            | liver             | positive     | 1.1   | 74     |
|         | 1415 part B | Pos       | Pos       | Neg         | Ductal moderately differentiated            | liver             | positive     | 7.2   | 2      |
|         | 8852 part A | N/A       | N/A       | N/A         | Malignant phyllodes, high grade sarcomatoid | chest wall        | negative     | 0     | 11.3   |
|         | 943 part C  | Pos, weak | Neg       | Neg         | Adeno poorly differentiated                 | lung              | positive     | 0     | 12.3   |

Colors: red for higher expression, yellow for lower expression, tones of orange for intermediate levels of expression.
