# Supplementary material
Source: PubMed Central journal article supplement (PMC10842363)
Supplement: NIHMS1939379-supplement-7.pdf [file NIHMS1939379-supplement-7.pdf]

**Supplementary Table 2: Enzymatic and cell based IC<sub>50</sub> values related to PERK, ATF4 and GCN2**

| Compound | PERK <sup>a</sup><br>Enzyme<br>IC <sub>50</sub> (μM) | PERK <sup>b</sup><br>Cell-based<br>IC <sub>50</sub> (μM) | PERK-activated<br>ATF4-luc <sup>c</sup><br>Cell-based<br>IC <sub>50</sub> (μM) | GCN2-activated<br>ATF4-luc <sup>d</sup><br>Cell-based<br>IC <sub>50</sub> (μM) |
|----------|------------------------------------------------------|----------------------------------------------------------|--------------------------------------------------------------------------------|--------------------------------------------------------------------------------|
| HC4      | 0.004                                                | 0.033                                                    | 0.067                                                                          | >10                                                                            |
| HC19     | 0.004                                                | 0.045                                                    | 0.072                                                                          | >10                                                                            |
| HC28     | 0.002                                                | 0.009                                                    | 0.026                                                                          | >10                                                                            |
| GSK157   | 0.002                                                | 0.014                                                    | 0.024                                                                          | >10                                                                            |

<sup>a</sup>PERK biochemical assay using purified eIF2a as substrate. <sup>b</sup>Cell-based assay of tunicamycin-induced eIF2a phosphorylation in 293 cells. <sup>c</sup>Cell-based assay of tunicamycin-induced (PERK activated) ATF4-Luc activity in 293 cells. <sup>d</sup>GCN2 Cell-based assay of Halofuginone-induced (GCN2 activated) ATF4-Luc activity in 293 cells.
