# Supplementary material
Source: PubMed Central journal article supplement (PMC10842363)
Supplement: NIHMS1939379-supplement-8.pdf [file NIHMS1939379-supplement-8.pdf]

**Supplementary Table 3: KINOMEScan™ screening comparison of HC4, HC19, HC28 and GSK-157 at concentrations of 0.1, 1.0 and 10 μM versus other eif2α kinases**

| KINOMEScan Gene Symbol | Entrez Gene Symbol | GSK-157 |        |         | HC4    |        |         | HC19   |        |         | HC28   |        |         |
|------------------------|--------------------|---------|--------|---------|--------|--------|---------|--------|--------|---------|--------|--------|---------|
|                        |                    | 0.1 μM  | 1.0 μM | 10.0 μM | 0.1 μM | 1.0 μM | 10.0 μM | 0.1 μM | 1.0 μM | 10.0 μM | 0.1 μM | 1.0 μM | 10.0 μM |
| EIF2AK1                | EIF2AK1            | 85      | 25     | 29      | 93     | 100    | 40      | 100    | 100    | 80      | 100    | 95     | 28      |
| PRKR                   | EIF2AK2            | 81      | 72     | 29      | 100    | 100    | 100     | 100    | 100    | 100     | 100    | 100    | 100     |
| GCN2(Kin.Dom.2,S808G)  | EIF2AK4            | 96      | 73     | 26      | 88     | 90     | 64      | 87     | 78     | 52      | 77     | 69     | 11      |

The compounds were screened at concentrations of 0.1, 1.0 and 10 mM , and results for primary screen binding interactions are reported as '% Ctrl', where lower numbers indicate stronger hits in the matrix. Red highlights those hits as <30% of Ctrl.
