# Supplementary material
Source: PubMed Central journal article supplement (PMC10842363)
Supplement: NIHMS1939379-supplement-9.pdf [file NIHMS1939379-supplement-9.pdf]

**Supplementary Table 4: KINOMEScan™ Selectivity Score for HC4, HC19, HC28 and GSK157 at concentrations of 0.1, 1.0 and 10 μM across 468 Kinases**

| Compound | Selectivity Score Type | Number of Hits | Number of Non-Mutant Kinases | Screening Concentrations | Selectivity Score |
|----------|------------------------|----------------|------------------------------|--------------------------|-------------------|
| HC4      | S(35)                  | 0              | 403                          | 100                      | 0                 |
| HC4      | S(10)                  | 0              | 403                          | 100                      | 0                 |
| HC4      | S(1)                   | 0              | 403                          | 100                      | 0                 |
| HC4      | S(35)                  | 2              | 403                          | 1000                     | 0.005             |
| HC4      | S(10)                  | 0              | 403                          | 1000                     | 0                 |
| HC4      | S(1)                   | 0              | 403                          | 1000                     | 0                 |
| HC4      | S(35)                  | 9              | 403                          | 10000                    | 0.022             |
| HC4      | S(10)                  | 3              | 403                          | 10000                    | 0.007             |
| HC4      | S(1)                   | 0              | 403                          | 10000                    | 0                 |
| HC19     | S(35)                  | 0              | 403                          | 100                      | 0                 |
| HC19     | S(10)                  | 0              | 403                          | 100                      | 0                 |
| HC19     | S(1)                   | 0              | 403                          | 100                      | 0                 |
| HC19     | S(35)                  | 0              | 403                          | 1000                     | 0                 |
| HC19     | S(10)                  | 0              | 403                          | 1000                     | 0                 |
| HC19     | S(1)                   | 0              | 403                          | 1000                     | 0                 |
| HC19     | S(35)                  | 11             | 403                          | 10000                    | 0.027             |
| HC19     | S(10)                  | 4              | 403                          | 10000                    | 0.01              |
| HC19     | S(1)                   | 0              | 403                          | 10000                    | 0                 |
| HC28     | S(35)                  | 1              | 403                          | 100                      | 0.002             |
| HC28     | S(10)                  | 0              | 403                          | 100                      | 0                 |
| HC28     | S(1)                   | 0              | 403                          | 100                      | 0                 |
| HC28     | S(35)                  | 3              | 403                          | 1000                     | 0.007             |
| HC28     | S(10)                  | 0              | 403                          | 1000                     | 0                 |
| HC28     | S(1)                   | 0              | 403                          | 1000                     | 0                 |
| HC28     | S(35)                  | 17             | 403                          | 10000                    | 0.042             |
| HC28     | S(10)                  | 6              | 403                          | 10000                    | 0.015             |
| HC28     | S(1)                   | 0              | 403                          | 10000                    | 0                 |
| GSK157   | S(35)                  | 2              | 403                          | 100                      | 0.005             |
| GSK157   | S(10)                  | 0              | 403                          | 100                      | 0                 |
| GSK157   | S(1)                   | 0              | 403                          | 100                      | 0                 |
| GSK157   | S(35)                  | 21             | 403                          | 1000                     | 0.052             |
| GSK157   | S(10)                  | 7              | 403                          | 1000                     | 0.017             |
| GSK157   | S(1)                   | 1              | 403                          | 1000                     | 0.002             |
| GSK157   | S(35)                  | 93             | 403                          | 10000                    | 0.231             |
| GSK157   | S(10)                  | 39             | 403                          | 10000                    | 0.097             |
| GSK157   | S(1)                   | 9              | 403                          | 10000                    | 0.022             |
