# Supplementary material
Source: PubMed Central journal article supplement (PMC10842363)
Supplement: NIHMS1939379-supplement-11.pdf [file NIHMS1939379-supplement-11.pdf]

**Supplementary Table 6: KINOMEScan™ screening comparison of HC4, HC19, HC28 and GSK-157 at concentrations of 0.1, 1.0 and 10 μM versus select kinases in the HER family signaling pathway**

| KINOMEScan Gene Symbol | Entrez Gene Symbol | GSK-157 |        |         | HC4    |        |         | HC19   |        |         | HC28   |        |         |
|------------------------|--------------------|---------|--------|---------|--------|--------|---------|--------|--------|---------|--------|--------|---------|
|                        |                    | 0.1 μM  | 1.0 μM | 10.0 μM | 0.1 μM | 1.0 μM | 10.0 μM | 0.1 μM | 1.0 μM | 10.0 μM | 0.1 μM | 1.0 μM | 10.0 μM |
| AKT1                   | AKT1               | 100     | 96     | 87      | 93     | 91     | 95      | 100    | 100    | 100     | 100    | 100    | 100     |
| AKT2                   | AKT2               | 94      | 100    | 95      | 94     | 100    | 100     | 100    | 96     | 98      | 100    | 100    | 100     |
| AKT3                   | AKT3               | 100     | 81     | 82      | 97     | 95     | 87      | 100    | 100    | 96      | 100    | 100    | 100     |
| EGFR                   | EGFR               | 100     | 100    | 92      | 100    | 79     | 77      | 100    | 99     | 100     | 100    | 100    | 98      |
| ERBB2                  | ERBB2              | 91      | 85     | 24      | 94     | 100    | 65      | 85     | 88     | 75      | 79     | 81     | 80      |
| ERBB3                  | ERBB3              | 88      | 96     | 87      | 92     | 91     | 90      | 99     | 100    | 92      | 83     | 93     | 89      |
| ERBB4                  | ERBB4              | 68      | 77     | 74      | 90     | 83     | 91      | 100    | 100    | 100     | 98     | 100    | 100     |
| ERK1                   | MAPK3              | 90      | 100    | 100     | 96     | 96     | 99      | 96     | 93     | 99      | 100    | 100    | 100     |
| ERK2                   | MAPK1              | 99      | 98     | 96      | 100    | 91     | 96      | 100    | 91     | 100     | 100    | 100    | 100     |
| ERK3                   | MAPK6              | 91      | 100    | 100     | 85     | 100    | 84      | 100    | 100    | 100     | 100    | 100    | 99      |
| ERK4                   | MAPK4              | 100     | 100    | 96      | 89     | 98     | 91      | 97     | 100    | 100     | 100    | 100    | 100     |
| ERK5                   | MAPK7              | 100     | 91     | 100     | 98     | 95     | 91      | 100    | 100    | 100     | 100    | 100    | 100     |
| ERK8                   | MAPK15             | 98      | 66     | 81      | 100    | 82     | 88      | 99     | 100    | 100     | 100    | 80     | 84      |
| S6K1                   | RPS6KB1            | 80      | 83     | 50      | 84     | 89     | 82      | 93     | 91     | 88      | 100    | 99     | 100     |
| SRC                    | SRC                | 88      | 60     | 7       | 93     | 95     | 86      | 100    | 100    | 100     | 100    | 100    | 97      |
| SYK                    | SYK                | 97      | 76     | 92      | 81     | 65     | 84      | 100    | 100    | 100     | 100    | 100    | 82      |
| CSK                    | CSK                | 89      | 97     | 41      | 95     | 96     | 81      | 98     | 94     | 89      | 97     | 98     | 93      |
| PIK3CA                 | PIK3CA             | 98      | 90     | 91      | 95     | 89     | 100     | 100    | 100    | 100     | 100    | 100    | 100     |
| PIK3CB                 | PIK3CB             | 97      | 100    | 100     | 100    | 100    | 97      | 84     | 91     | 70      | 91     | 90     | 89      |
| PIK3CG                 | PIK3CG             | 92      | 76     | 72      | 76     | 88     | 60      | 100    | 100    | 75      | 100    | 100    | 100     |
| PIK3C2B                | PIK3C2B            | 63      | 94     | 5       | 85     | 73     | 7       | 100    | 40     | 1       | 100    | 59     | 25      |
| PYK2                   | PTK2B              | 91      | 84     | 85      | 91     | 89     | 93      | 100    | 100    | 100     | 100    | 100    | 100     |

The compounds were screened at concentrations of 0.1, 1.0 and 10 μM, and results for primary screen binding interactions are reported as '% Ctrl', where lower numbers indicate stronger hits in the matrix. Red highlights those hits as <30% of Ctrl.
