# Supplementary material
Source: PubMed Central journal article supplement (PMC10842363)
Supplement: NIHMS1939379-supplement-12.pdf [file NIHMS1939379-supplement-12.pdf]

**Supplementary Table 7: KINOMEscan™ screening comparison of HC4, HC19, HC28 and GSK-157 at concentrations of 0.1, 1.0 and 10 mM versus RIPK1, AURKB, AXL, EPHB6, FLT3, KIT and KIT (V599D), kinases potentially engaged by GSK157**

| KINOMEscan Gene Symbol | Entrez Gene Symbol | GSK-157 |        |         | HC4    |        |         | HC19   |        |         | HC28   |        |         |
|------------------------|--------------------|---------|--------|---------|--------|--------|---------|--------|--------|---------|--------|--------|---------|
|                        |                    | 0.1 μM  | 1.0 μM | 10.0 μM | 0.1 μM | 1.0 μM | 10.0 μM | 0.1 μM | 1.0 μM | 10.0 μM | 0.1 μM | 1.0 μM | 10.0 μM |
| RIPK1                  |                    | 15      | 0.1    | 0       | 97     | 100    | 100     | 100    | 100    | 98      | 100    | 100    | 100     |
| AURKB                  |                    | 80      | 34     | 5       | 78     | 80     | 82      | 97     | 96     | 81      | 78     | 87     | 75      |
| AXL                    |                    | 41      | 19     | 8       | 94     | 95     | 70      | 93     | 95     | 77      | 100    | 94     | 70      |
| EPHB6                  |                    | 83      | 41     | 5       | 98     | 100    | 87      | 100    | 100    | 96      | 100    | 100    | 79      |
| FLT3                   |                    | 90      | 63     | 11      | 100    | 99     | 66      | 96     | 91     | 73      | 98     | 100    | 55      |
| KIT                    |                    | 49      | 6      | 0.1     | 85     | 94     | 73      | 100    | 100    | 82      | 100    | 100    | 100     |
| KIT (V559D)            |                    | 46      | 4      | 0.15    | 97     | 100    | 91      | 100    | 100    | 78      | 100    | 100    | 65      |

The compounds were screened at concentrations of 0.1, 1.0 and 10 mM, and results for primary screen binding interactions are reported as '% Ctrl', where lower numbers indicate stronger hits in the matrix. Red highlights those hits as <30% of Ctrl.
